# Supplementary material for: Suppression of liquid–liquid phase separation by 1,6-hexanediol partially compromises the 3D genome organization in living cells
Source: PubMed Central journal article supplement — Nucleic Acids Res. 2021 Apr 9;49(18):10524–41. doi: 10.1093/nar/gkab249 (PMC8501969; doi:10.1093/nar/gkab249), 2021-04-09
Supplement: gkab249_supplemental_file.pdf [file gkab249_supplemental_file.pdf]

## Supplementary Figure S1

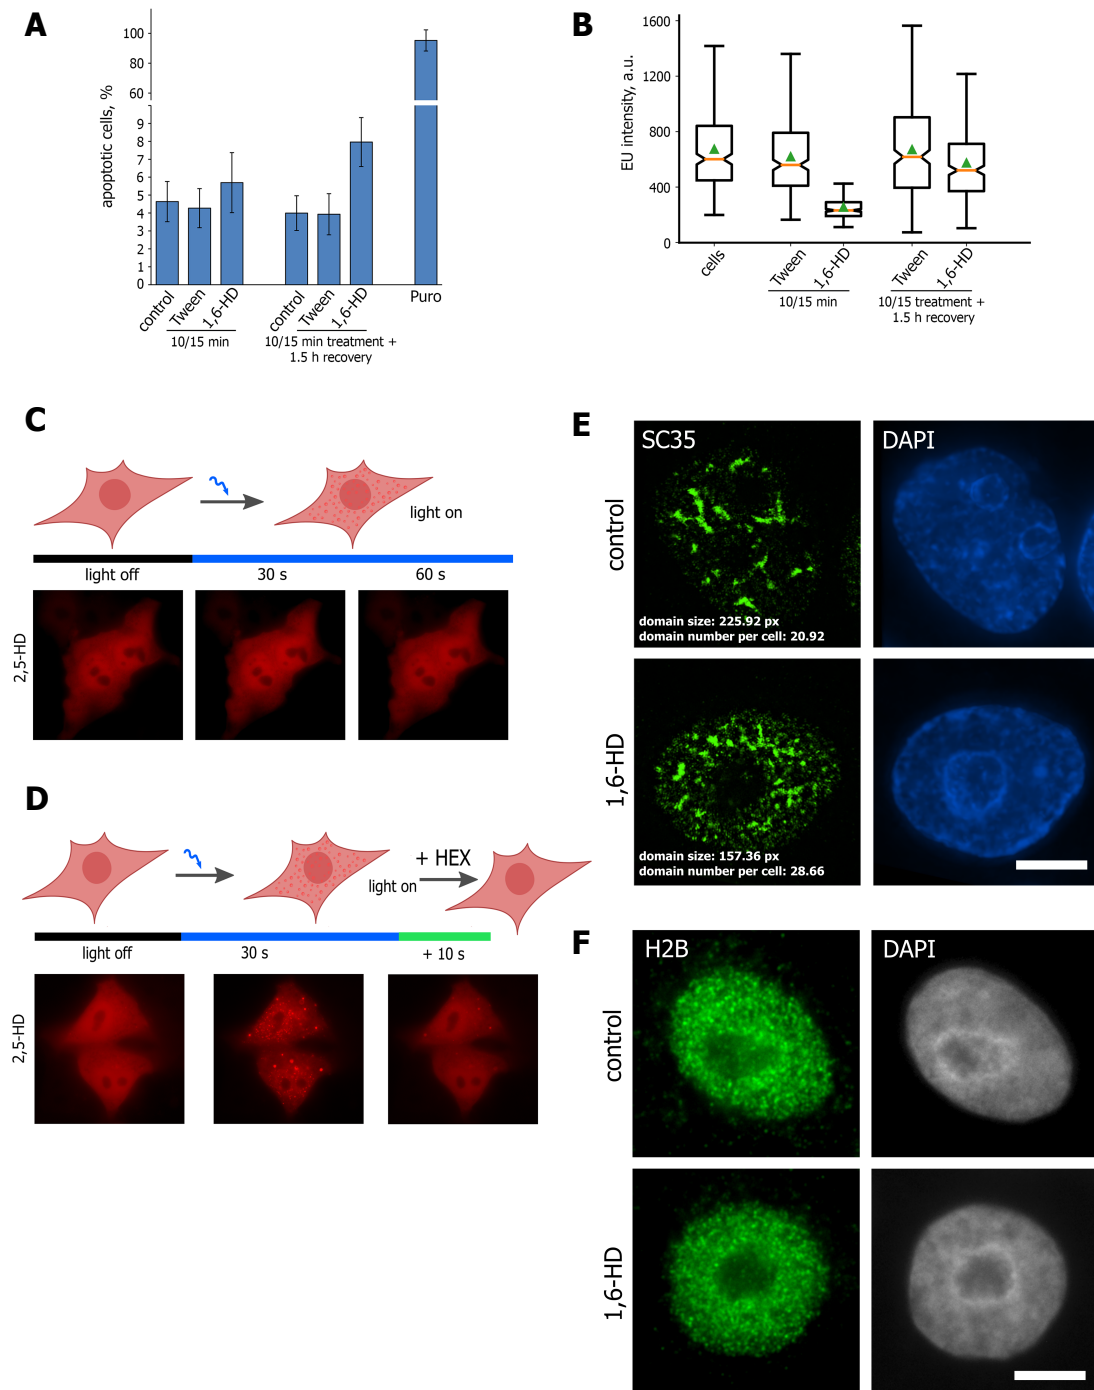

**Supplementary Figure S1.** 1,6-HD affects LLPS in living human cells. **(A)** HeLa cells were untreated or treated with Tween 20 (1%, 10 min; “Tween”), followed with 1,6-HD (5%, 15 min; “1,6-HD”) before being analyzed using CellEvent Caspase 3/7 Detection Reagent. The cells treated as described and then incubated in fresh culture medium for 1.5 h were analysed as well. Percentage of caspase 3/7-positive (apoptotic) cells is shown. **(B)** HeLa cells treated as described in (A) were pulsed with 5-ethyniluridine (EU, 200  $\mu$ M, 15 min). Box plots show the EU fluorescence intensities. Horizontal lines represent the medians. **(C)** HeLa cells transfected with pHT-FUSN-mCh-Cry2WT were transiently permeabilized with Tween 20 and treated with 2,5-HD (5%, 15 min). OptoDroplet formation was monitored as described in Shin et al., 2017. Accompanying untreated (control) and 1,6-HD-treated cells are shown in Fig. 1A. **(D)** HeLa cells transfected with pHT-FUSN-mCh-Cry2WT were light-illuminated to induce optoDroplet formation. Then 2,5-HD (5%) was added to the culture medium; optoDroplet existence was monitored after ten seconds of incubation with the drug. Accompanying 1,6-HD-treated cells are shown in Fig. 1B. **(E)** HeLa cells were first transiently permeabilized with Tween 20 and then were either left untreated (control) or treated with 1,6-HD (5%, 15 min) before being stained for SC35 (SRSF2). The DNA was stained with DAPI. The samples were analyzed by structured illumination microscopy (SIM). Nanodomain clustering analysis (see Methods for details) was performed (13 control cells and 9 1,6-HD-treated cells were analyzed). Average nanodomain cluster sizes and numbers of nanodomains per cell are depicted in each case. **(F)** HeLa cells treated as in (E) were stained for histone H2B and analyzed by epifluorescence microscopy. The DNA was stained with DAPI. Scale bar: 10  $\mu$ m.

## Supplementary Figure S2

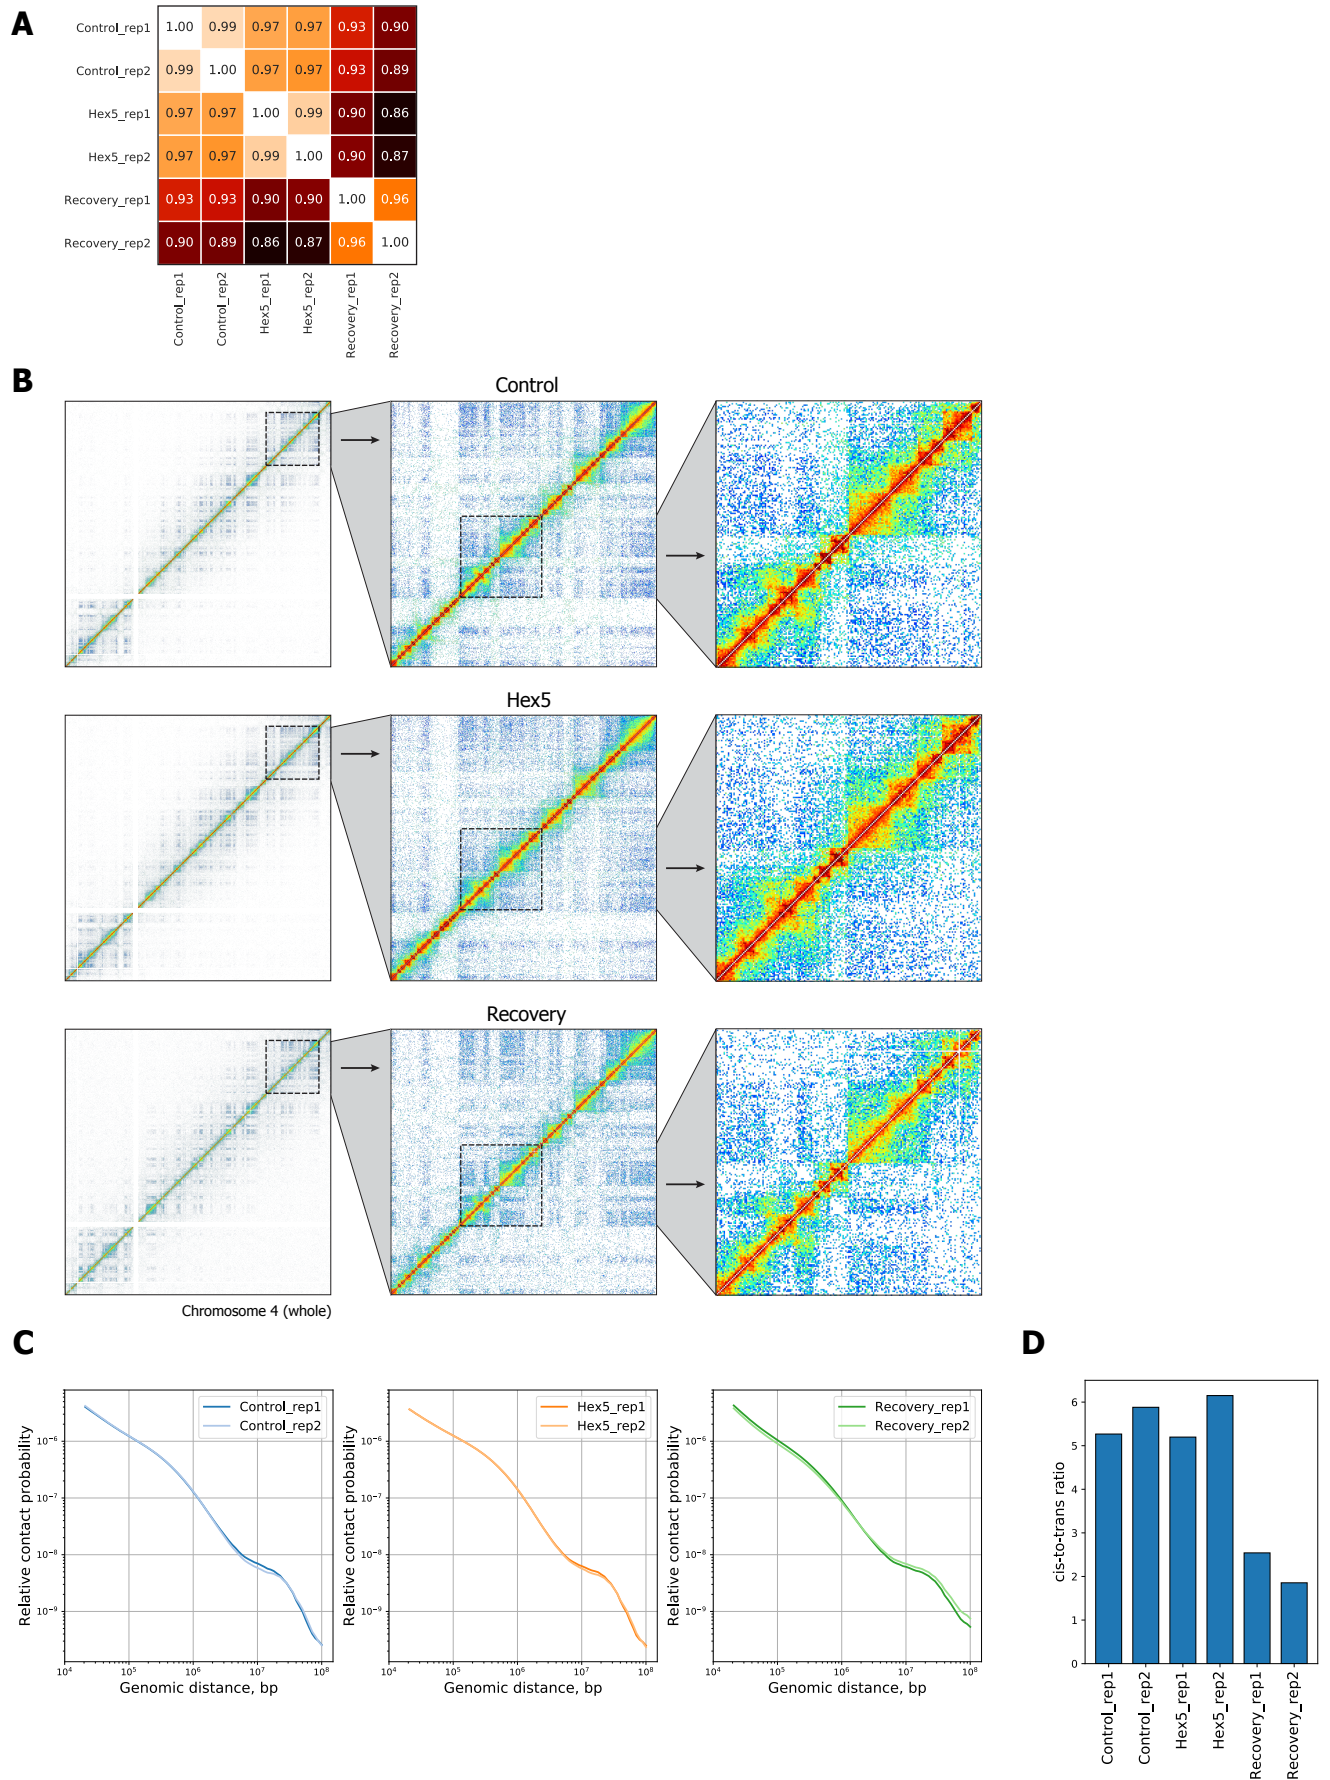

**Supplementary Figure S2.** Hi-C data processing. **(A)** Pearson's correlation coefficient between biological replicates of the Hi-C experiments. **(B)** Visualization of the Control, Hex5, and Recovery contact matrices at a 20-kb resolution. **(C)** Dependence of contact probability,  $P_c(s)$ , on genomic distance,  $s$  for the Control, Hex5, and Recovery biological replicates. **(D)** Ratio between cis (intrachromosomal) and trans (interchromosomal) contacts for the Control, Hex5, and Recovery biological replicates.

## Supplementary Figure S3

**A**

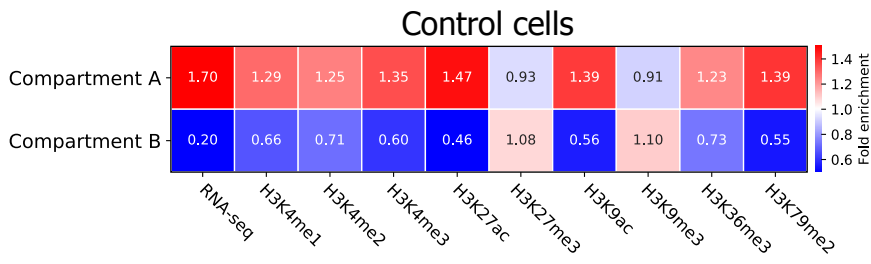

**B**

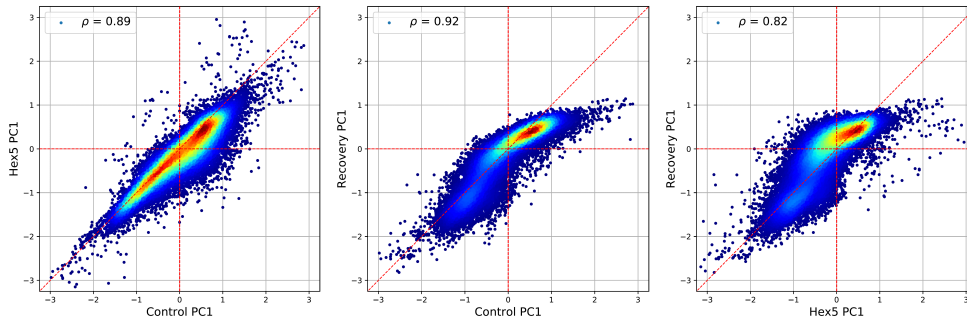

**C**

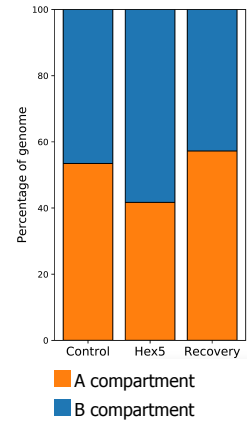

**Supplementary Figure S3.** Compartment annotation. **(A)** Enrichment of different epigenetic markers in the A and B compartments annotated in control cells. **(B)** Scatter plots showing the correlations among PC1 values for the Control, Hex5, and Recovery samples. **(C)** Coverage of the genome with A and B compartments.

# Supplementary Figure S4

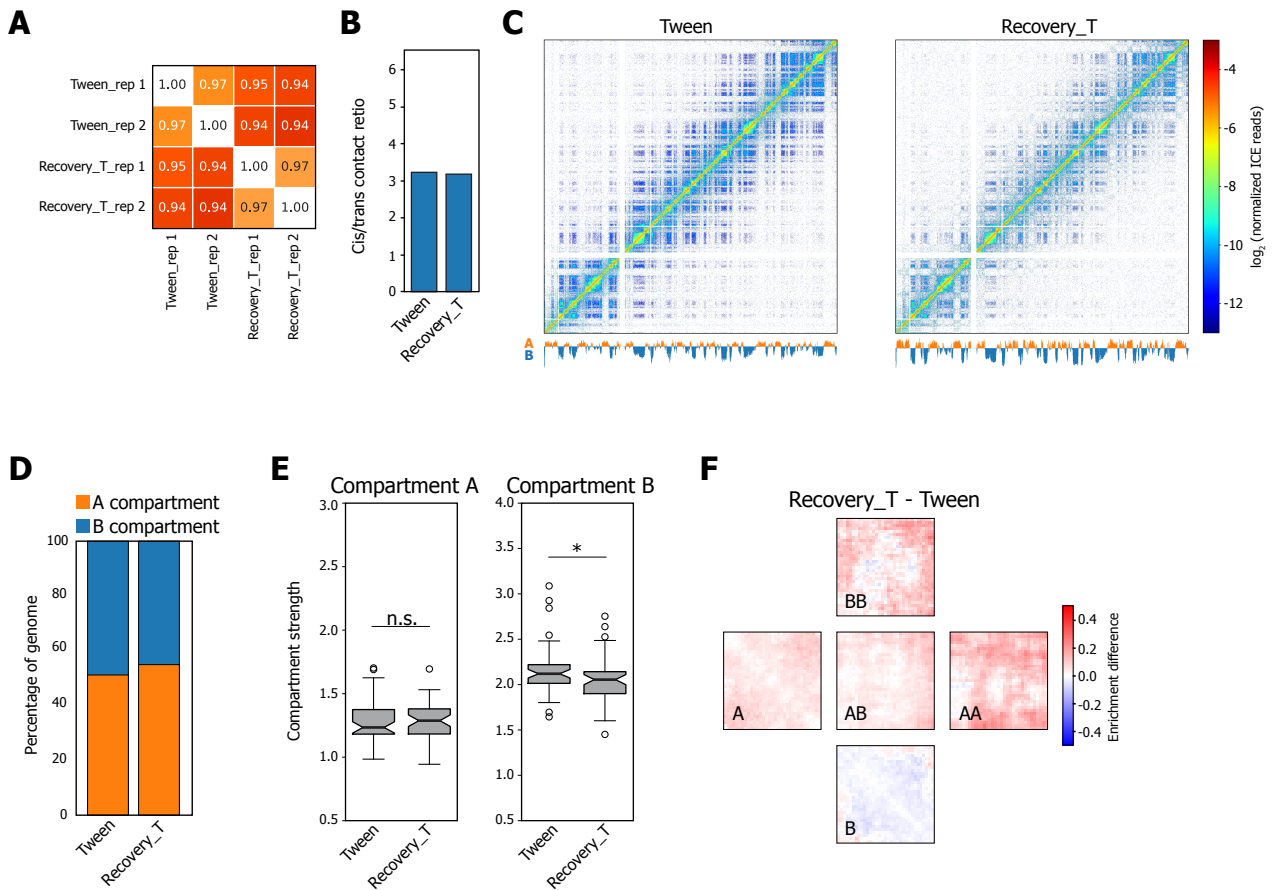

**Supplementary Figure S4.** Hi-C data processing and compartment annotation in control experiments for Tween permeabilization (Tween-treated HeLa cells). **(A)** Pearson’s correlation coefficient between biological replicates of the Hi-C experiments for cells treated with Tween 20 (“Tween”) and incubated in a fresh growth media after permeabilization for 1.5 h (“Recovery\_T”). **(B)** Ratio between cis (intrachromosomal) and trans (interchromosomal) contacts. **(C)** Visualization of Hi-C contact matrices at a 100-kb resolution. **(D)** Coverage of the genome with A and B compartments. **(E)** Compartment strength in cis. \* $P < 0.05$ , n.s., non-significant difference in a Mann-Whitney U-test. **(F)** Pairwise subtraction Recovery\_T and Tween pentads.

## Supplementary Figure S5

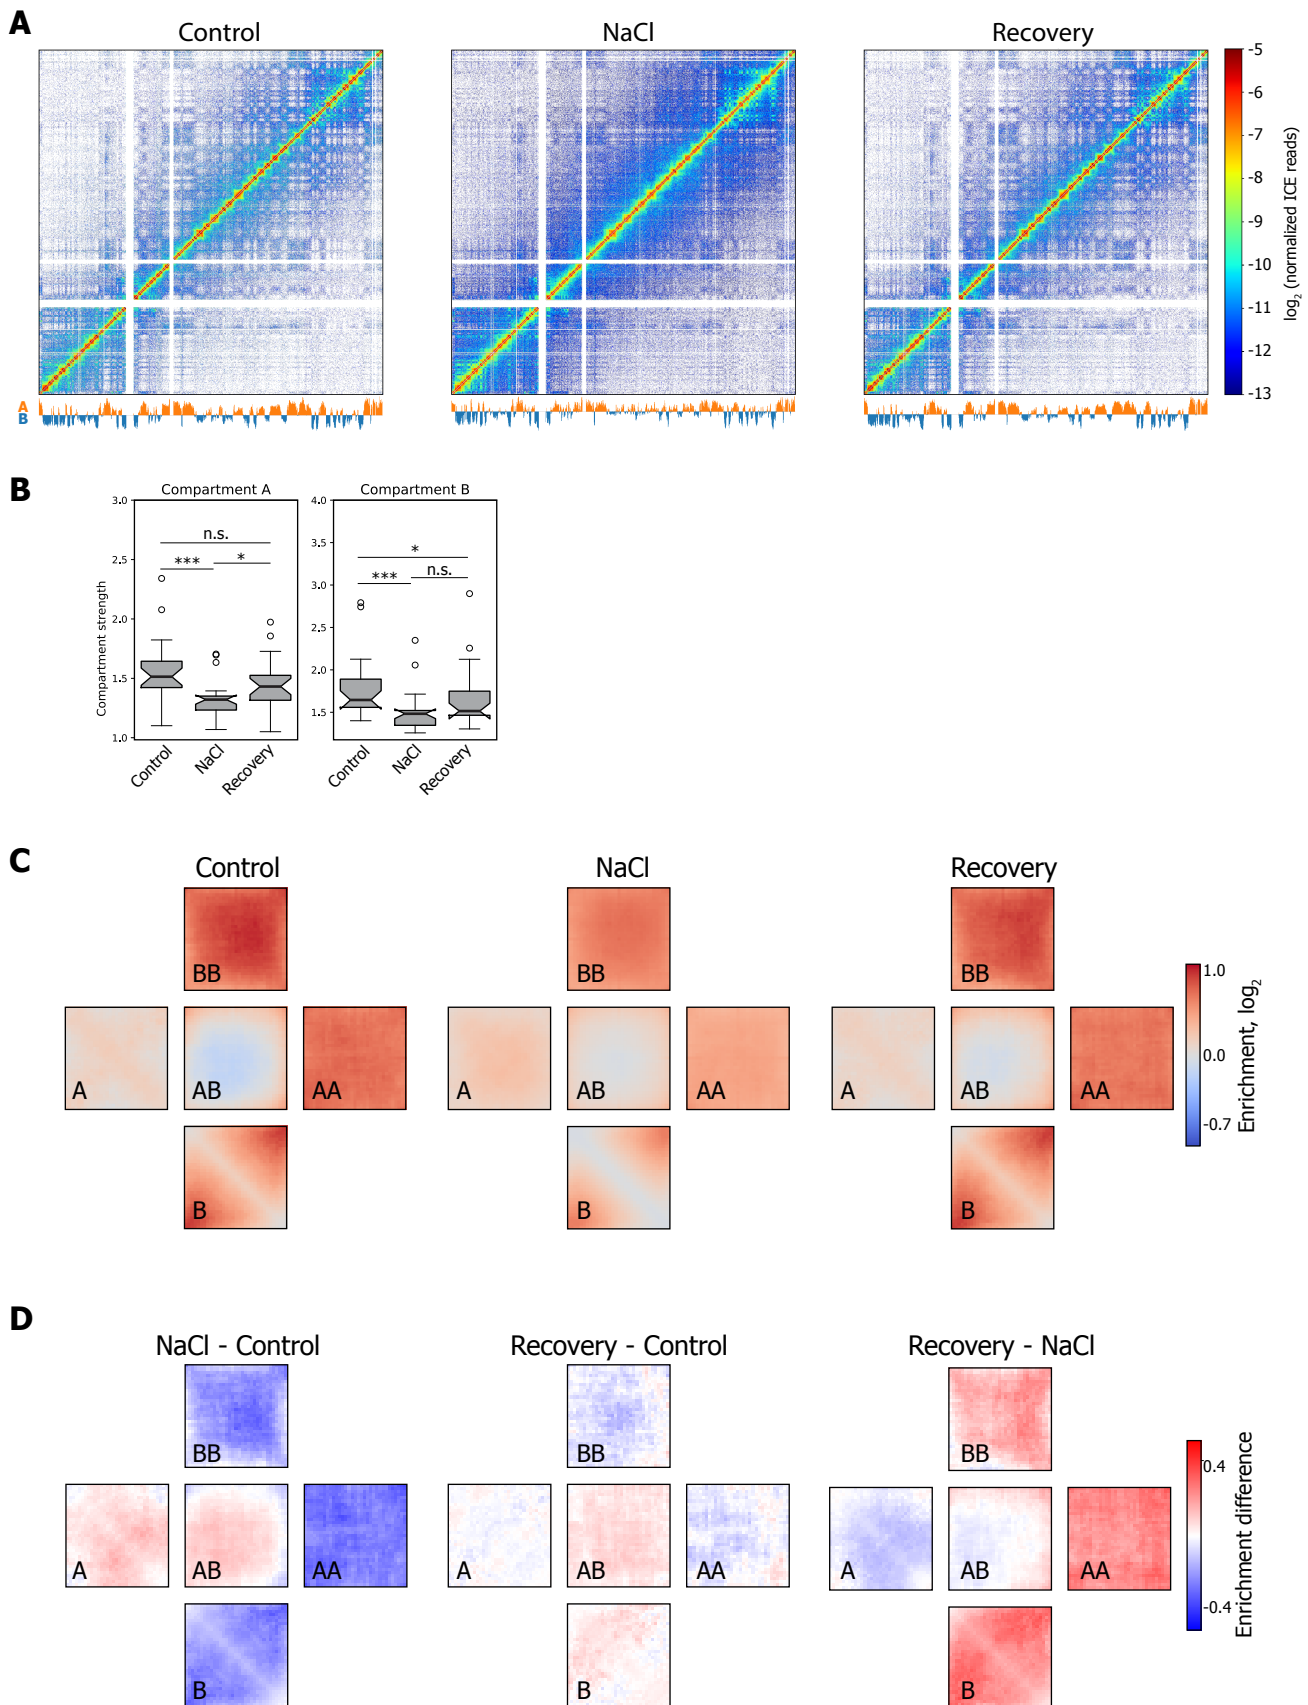

**Supplementary Figure S5.** Reanalysis of the Hi-C data reported by Amat et al. **(A)** Examples of Hi-C matrices visualized at a 100-kb resolution. **(B)** Compartment strength in control cells, after hyperosmotic shock (NaCl), and after recovery. \*\*\* $P < 0.001$ , n.s. – non-significant difference in a Mann-Whitney U-test. **(C)** Plots (pentads) showing the observed over the expected contact frequencies inside the A and B compartments at short and large genomic distances and between compartments. **(D)** Pairwise subtractions of Control, NaCl, and Recovery pentads.

# Supplementary Figure S6

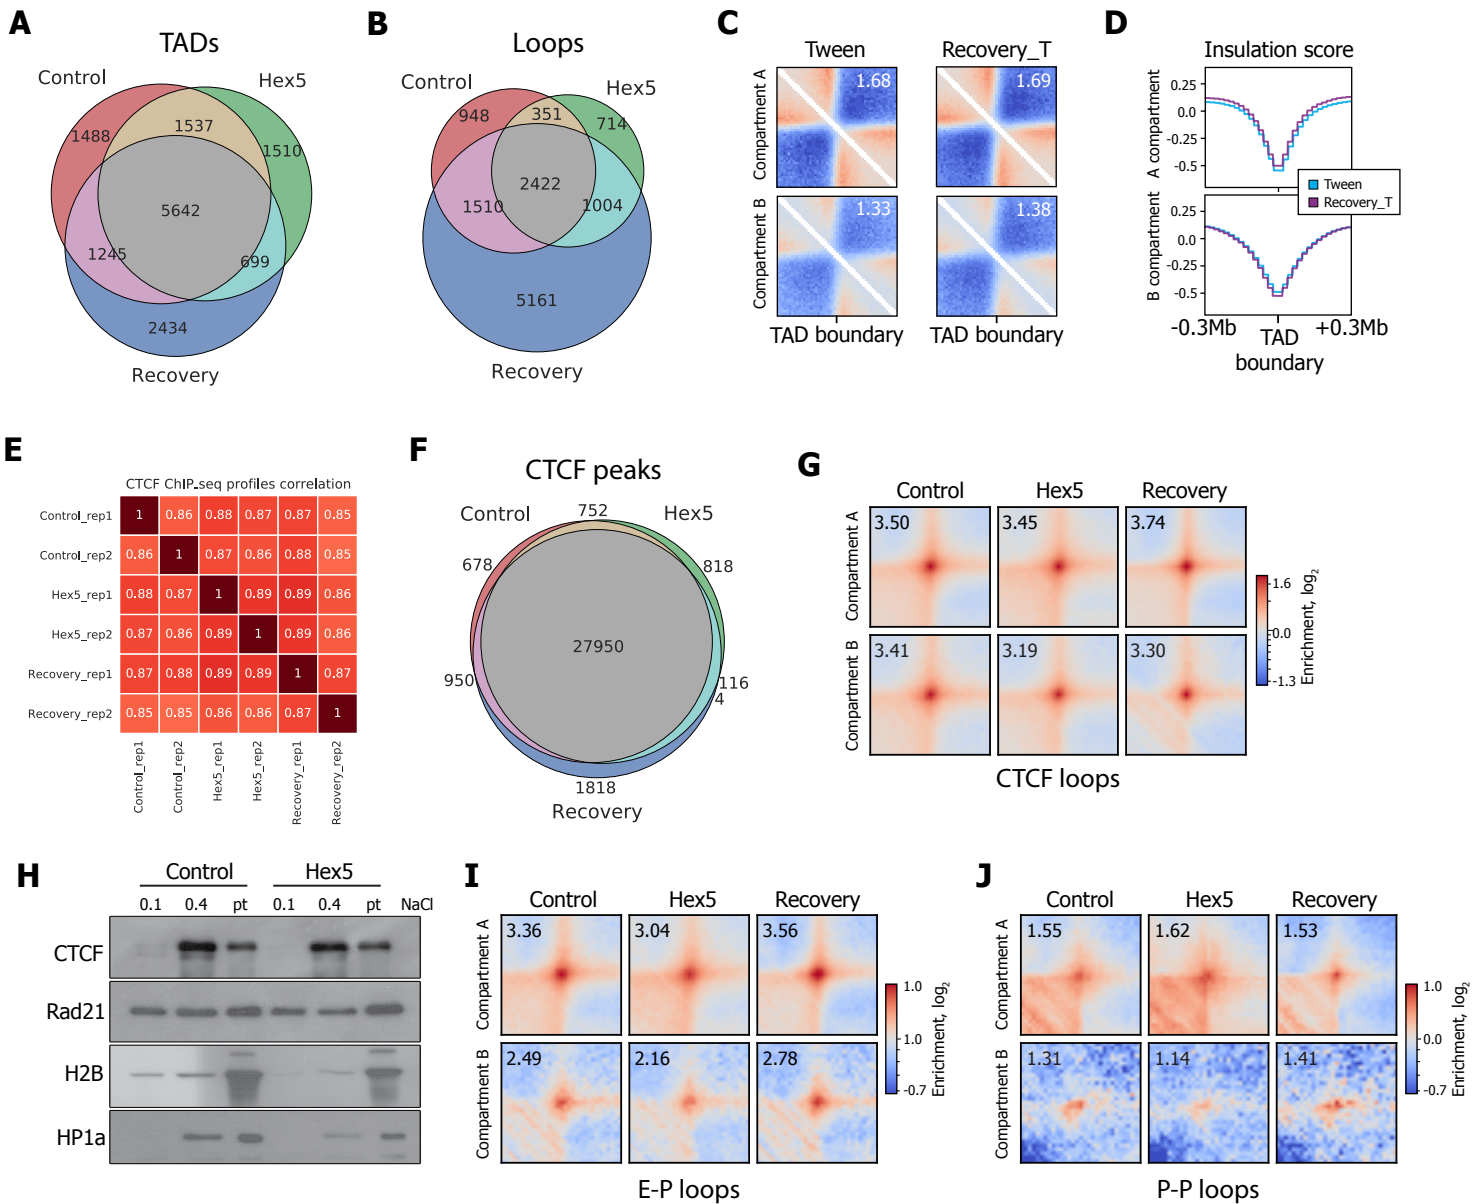

**Supplementary Figure S6.** (A) Venn diagram showing overlapping of TAD boundaries identified in the Control, Hex5, and Recovery samples. (B) Venn diagram showing overlapping of loop anchors identified in the Control, Hex5, and Recovery samples. (C) Average TAD boundary for the Tween and Recovery\_T samples. Number in the upper-right corner shows the boundary strength calculated as the mean value of the average intra-TAD interactions (upper-left and bottom-right quarters) divided by the mean value of average inter-TAD interactions (upper-right quarter). (D) Averaged insulation score profile around TAD boundaries ( $\pm 0.3$  Mb). (E) Pearson's correlation coefficient between biological replicates of the ChIP-seq experiments. (F) Venn diagram showing overlapping CTCF peak sets identified in the Control, Hex5, and Recovery samples. (G) Average CTCF-mediated loop in A and B compartments. Number in the upper-left corner shows the enrichment of contacts inside the loop pixel over the background. (H) Western blot analysis of CTCF, Rad21, HP1 $\alpha$  and histone H2B in different chromatin fractions from control and 1,6-HD-treated HeLa cells prepared by sequential extraction with 0.1 and 0.4 M NaCl. Pellet (Pt): insoluble chromatin fraction. (I) Average enhancer-promoter loop in A and B compartments. Number in the upper-left corner shows the enrichment of contacts inside the loop pixel over the background. (J) Average promoter-promoter loop in A and B compartments. Number in the upper-left corner shows the enrichment of contacts inside the loop pixel over the background.

**Supplementary Table S1. Statistics of the Hi-C data processing.**

| Replica           | Initial reads | Total DS+SS reads | Total DS reads | Same fragment: Total | Same fragment: Self-circles | Same fragment: Dangling ends | Extra Dangling Ends | Valid Pairs | Duplicates | Too Large or Small fragments | Overrepresented fragments | Reads after all filters | cis Reads   | trans Reads |
|-------------------|---------------|-------------------|----------------|----------------------|-----------------------------|------------------------------|---------------------|-------------|------------|------------------------------|---------------------------|-------------------------|-------------|-------------|
| <b>Control</b>    | 437 253 878   | 396 000 932       | 298 985 842    | 15 988 723           | 1 451 671                   | 6 951 642                    | 42 001 042          | 240 996 077 | 52 675 537 | 18 735 110                   | 11 308 550                | 158 276 880             | 134 205 654 | 24 071 226  |
| Control_rep1      | 235 131 545   | 212 458 103       | 160 256 927    | 9 845 610            | 803 259                     | 5 060 999                    | 26 917 815          | 123 493 502 | 32 249 934 | 11 187 909                   | 5 051 705                 | 75 003 954              | 63 036 500  | 11 967 454  |
| Control_rep2      | 202 122 333   | 183 542 829       | 138 728 915    | 6 143 113            | 648 412                     | 1 890 643                    | 15 083 227          | 117 502 575 | 20 301 091 | 7 578 165                    | 6 266 520                 | 83 356 799              | 71 242 615  | 12 114 184  |
| <b>Hex5</b>       | 422 360 671   | 383 381 051       | 288 444 606    | 15 772 555           | 1 578 045                   | 3 885 896                    | 27 882 137          | 244 789 914 | 52 204 724 | 11 358 061                   | 13 471 273                | 167 755 856             | 142 643 957 | 25 111 899  |
| Hex5_rep1         | 209 779 792   | 189 480 973       | 141 845 962    | 8 855 152            | 772 540                     | 2 422 002                    | 14 660 325          | 118 330 485 | 29 392 236 | 5 669 991                    | 6 496 634                 | 76 771 624              | 64 383 842  | 12 387 782  |
| Hex5_rep2         | 212 580 879   | 193 900 078       | 146 598 644    | 6 917 403            | 805 505                     | 1 463 894                    | 13 221 812          | 126 459 429 | 22 641 441 | 5 709 861                    | 6 957 911                 | 91 150 216              | 78 401 532  | 12 748 684  |
| <b>Recovery</b>   | 463 832 161   | 429 271 105       | 326 810 978    | 15 989 379           | 1 558 099                   | 6 814 189                    | 47 074 600          | 263 746 999 | 44 265 708 | 15 451 322                   | 10 471 612                | 193 558 357             | 132 242 037 | 61 316 320  |
| Recovery_rep1     | 224 845 841   | 207 680 580       | 158 016 235    | 7 185 134            | 778 161                     | 2 766 436                    | 20 508 097          | 130 323 004 | 21 890 163 | 7 675 042                    | 5 285 969                 | 95 471 830              | 68 513 580  | 26 958 250  |
| Recovery_rep2     | 238 986 320   | 221 590 525       | 168 794 743    | 8 804 245            | 779 938                     | 4 047 753                    | 26 566 503          | 133 423 995 | 22 292 486 | 7 786 490                    | 5 277 518                 | 98 067 501              | 63 716 691  | 34 350 810  |
| <b>Tween</b>      | 99 413 752    | 89 619 529        | 67 850 585     | 3 947 261            | 132 152                     | 3 594 334                    | 13 506 158          | 50 397 166  | 3 623 895  | 3 891 810                    | 2 347 932                 | 40 533 529              | 30 903 988  | 9 629 541   |
| Tween_rep1        | 53 484 070    | 48 134 790        | 36 350 323     | 2 233 175            | 69 577                      | 2 044 708                    | 7 354 117           | 26 763 031  | 1 880 438  | 2 084 189                    | 1 211 751                 | 21 586 653              | 16 205 842  | 5 380 811   |
| Tween_rep2        | 45 929 682    | 41 484 739        | 31 500 262     | 1 714 086            | 62 575                      | 1 549 626                    | 6 152 041           | 23 634 135  | 1 741 382  | 1 807 858                    | 1 060 423                 | 19 024 472              | 14 760 864  | 4 263 608   |
| <b>Recovery_T</b> | 81 741 958    | 74 636 017        | 56 508 854     | 2 950 556            | 107 809                     | 2 875 251                    | 10 082 000          | 43 476 298  | 3 226 347  | 3 211 630                    | 1 667 186                 | 35 371 135              | 26 919 384  | 8 451 751   |
| Recovery_T_rep1   | 43 942 126    | 40 143 895        | 30 364 483     | 1 594 944            | 64 627                      | 1 440 829                    | 5 153 120           | 23 616 419  | 1 641 872  | 1 710 889                    | 913 980                   | 19 349 678              | 14 852 196  | 4 497 482   |
| Recovery_T_rep2   | 37 799 832    | 34 492 122        | 26 144 371     | 1 355 612            | 43 182                      | 1 234 422                    | 4 928 880           | 19 859 879  | 1 583 525  | 1 500 865                    | 794 494                   | 15 980 995              | 12 031 241  | 3 949 754   |

**Supplementary Table 2.** List of publicly available data used in this work.

| Data type                      | Description                                                                                                                                  | URL                                                                                                                                                                                                                                                                       |      |               |                                         |                                                                                                                                         |
|--------------------------------|----------------------------------------------------------------------------------------------------------------------------------------------|---------------------------------------------------------------------------------------------------------------------------------------------------------------------------------------------------------------------------------------------------------------------------|------|---------------|-----------------------------------------|-----------------------------------------------------------------------------------------------------------------------------------------|
| ENCODE<br>ChromHMM,<br>Segway  | Combined chromatin<br>state segmentation                                                                                                     | <a href="http://hgdownload.soe.ucsc.edu/goldenPath/hg19/encodeDCC/wgEncodeAwaSegmentation/wgEncodeAwaSegmentationCombinedHelas3.bed.gz">http://hgdownload.soe.ucsc.edu/goldenPath/hg19/encodeDCC/wgEncodeAwaSegmentation/wgEncodeAwaSegmentationCombinedHelas3.bed.gz</a> |      |               |                                         |                                                                                                                                         |
| ENCODE<br>RNA-seq              | PolyA+ RNA-seq, raw<br>reads                                                                                                                 | <a href="https://www.ncbi.nlm.nih.gov/geo/query/acc.cgi?acc=GSE86661">https://www.ncbi.nlm.nih.gov/geo/query/acc.cgi?acc=GSE86661</a>                                                                                                                                     |      |               |                                         |                                                                                                                                         |
| ENCODE<br>DNase-seq            | DNase-seq, aligned<br>bam files                                                                                                              | <a href="http://hgdownload.cse.ucsc.edu/goldenPath/hg19/encodeDCC/wgEncodeOpenChromDnase/">http://hgdownload.cse.ucsc.edu/goldenPath/hg19/encodeDCC/wgEncodeOpenChromDnase/</a>                                                                                           |      |               |                                         |                                                                                                                                         |
| ENCODE<br>Histone CHIP-<br>seq | ChIP-seq, bigWig and<br>broadPeak files<br>H3K4me1<br>H3K4me2<br>H3K4me3<br>H3K9me3<br>H3K9ac<br>H3K27me3<br>H3K27ac<br>H3K36me3<br>H3K79me2 | <a href="http://hgdownload.cse.ucsc.edu/goldenPath/hg19/encodeDCC/wgEncodeBroadHistone/">http://hgdownload.cse.ucsc.edu/goldenPath/hg19/encodeDCC/wgEncodeBroadHistone/</a>                                                                                               |      |               |                                         |                                                                                                                                         |
| Amat et al 2019                | Control, Hyperosmotic<br>stress, Recovery                                                                                                    | T47D                                                                                                                                                                                                                                                                      | hg19 | Hi-C, RNA-seq | Processed as<br>described in<br>Methods | <a href="https://www.ncbi.nlm.nih.gov/geo/query/acc.cgi?acc=GSE111804">https://www.ncbi.nlm.nih.gov/geo/query/acc.cgi?acc=GSE111804</a> |
